# Supplementary material for: Onkologische Pflege: Assessments im Erstgespräch
Source: Springer Nature journal article supplement (doi:10.1007/s41906-022-2006-1), 2023-02-17
Supplement: MOESM1 [file 24037142]

## Literatur

### zum Beitrag „Onkologische Pflege: Assessments im Erstgespräch“

von Amrei Christin Mehler-Klamt, Matthias Naegele, Kristina Lippach

*PflegeZeitschrift* (76) 3/2023, S. 22-25

- Apor E, Connell NT, Faricy-Anderson K, Barth P, YoussefRet al (2018) Prechemotherapy education: reducing patient anxiety through nurse-led teaching sessions. *Clin J Oncol Nurs* 22(1):76–82. <https://doi.org/10.1188/18.CJON.76-82>
- Arends J, Bertz H, Bischoff S, Fietkau R, Herrmann H, Holm E, Horneber M, Hütterer E, Körber J, Schmid I (2015) S3-Leitlinie der Deutschen Gesellschaft für Ernährungsmedizin e. V. (DGEM) in Kooperation mit der Deutschen Gesellschaft für Hämatologie und Onkologie e. V. (DGHO), der Arbeitsgemeinschaft „Supportive Maßnahmen in der Onkologie, Rehabilitation und Sozialmedizin“ der Deutschen Krebsgesellschaft (ASORS) und der Österreichischen Arbeitsgemeinschaft für klinische Ernährung (AKE). *Aktuel Ernährungsmed* 40(05):e1–e74. <https://doi.org/10.1055/s-0035-1552741>
- Deutsche Gesellschaft für Palliativmedizin (Hrsg) (2016) Palliativmedizinisches Basisassessment. [https://www.dgpalliativmedizin.de/images/Palliativmedizinisches\\_Basisassessment\\_2016\\_%C3%BCberarb\\_2018.pdf](https://www.dgpalliativmedizin.de/images/Palliativmedizinisches_Basisassessment_2016_%C3%BCberarb_2018.pdf). Zugegriffen: 21. Juli 2022
- Deutsche Krebsgesellschaft, Deutsche Krebshilfe (2021) Nationales Zertifizierungsprogramm Krebs. Erhebungsbogen für Onkologische Spitzenzentren und Onkologische Zentren. <https://www.onkoziert.de/onkologische-zentren/>. Zugegriffen: 21. Juli 2022
- Deutsches Netzwerk für Qualitätsentwicklung in der Pflege (2019) Expertenstandard Entlassungsmanagement in der Pflege. [https://www.dnqp.de/fileadmin/HSOS/Homepages/DNQP/Dateien/Expertenstandards/Entlassungsmanagement\\_in\\_der\\_Pflege/Entlassung\\_2Akt\\_Auszug.pdf](https://www.dnqp.de/fileadmin/HSOS/Homepages/DNQP/Dateien/Expertenstandards/Entlassungsmanagement_in_der_Pflege/Entlassung_2Akt_Auszug.pdf). Zugegriffen: 26 Juli 2022
- Durchschlag D, Hojdelewicz BM, Pfeifer-Rabe M (2019) Onkologische Gesundheits- und Krankenpflege: Menschen mit malignen Erkrankungen ganzheitlich begleiten. facultas, Wien
- Herschbach P, Weis J (Hrsg) (2010) Screeningverfahren in der Psychoonkologie: Testinstrumente zur Identifikation betreuungsbedürftiger Krebspatienten. [https://www.dapo-ev.de/wp-content/uploads/2017/04/pso\\_broschuere2.pdf](https://www.dapo-ev.de/wp-content/uploads/2017/04/pso_broschuere2.pdf). Zugegriffen: 26. Juli 2022 (Eine Empfehlung der PSO für die psychoonkologische Behandlungspraxis)
- Hojdelewicz B (2018) Der Pflegeprozess. facultas, Wien
- Kondrup J, Rasmussen HH, Hamberg O, Stanga Z, Ad Hoc ESPEN Working Group (2003) Nutritional risk screening (NRS 2002): a new method based on an analysis of controlled clinical trials. *Clin Nutr* 22(3):321–336. [https://doi.org/10.1016/s0261-5614\(02\)00214-5](https://doi.org/10.1016/s0261-5614(02)00214-5)

Leitlinienprogramm Onkologie (Deutsche Krebsgesellschaft, Deutsche Krebshilfe, AWMF) (Hrsg) (2021) Komplementärmedizin. Eine Leitlinie für Patienten mit einer Krebserkrankung. Patientenleitlinie. [https://www.leitlinienprogramm-onkologie.de/fileadmin/user\\_upload/Downloads/Patientenleitlinien/Patientenleitlinie\\_Komplementaermedizin\\_199\\_0012.pdf](https://www.leitlinienprogramm-onkologie.de/fileadmin/user_upload/Downloads/Patientenleitlinien/Patientenleitlinie_Komplementaermedizin_199_0012.pdf)

Leitlinienprogramm Onkologie (Deutsche Krebsgesellschaft, Deutsche Krebshilfe, AWMF) (Hrsg) (2018) Prävention, Diagnostik, Therapie und Nachsorge des Lungenkarzinoms: Langversion 1.0. [https://www.leitlinienprogramm-onkologie.de/fileadmin/user\\_upload/Downloads/Leitlinien/Lungenkarzinom/LL\\_Lungenkarzinom\\_Langversion\\_1.0.pdf](https://www.leitlinienprogramm-onkologie.de/fileadmin/user_upload/Downloads/Leitlinien/Lungenkarzinom/LL_Lungenkarzinom_Langversion_1.0.pdf). Zugegriffen: 19. Mai 2022 (AWMF-Registernummer: 020/007OL)

Leitlinienprogramm Onkologie (Deutsche Krebsgesellschaft, Deutsche Krebshilfe, AWMF) (Hrsg) (2016) Psychoonkologie. Psychosoziale Unterstützung für Krebspatienten und Angehörige. Patientenleitlinie. [https://www.leitlinienprogramm-onkologie.de/fileadmin/user\\_upload/Downloads/Patientenleitlinien/Patientenleitlinie\\_Psychoonkologie-1750017.pdf](https://www.leitlinienprogramm-onkologie.de/fileadmin/user_upload/Downloads/Patientenleitlinien/Patientenleitlinie_Psychoonkologie-1750017.pdf)

Leitlinienprogramm Onkologie (Deutsche Krebsgesellschaft, Deutsche Krebshilfe, AWMF) (Hrsg) (2014) Psychoonkologische Diagnostik, Beratung und Behandlung von erwachsenen Krebspatienten: Langversion 1.1. [https://www.awmf.org/uploads/tx\\_szleitlinien/032-051OLI\\_S3\\_Psychoonkologische\\_Beratung\\_Behandlung\\_2014-01\\_abgelaufen.pdf](https://www.awmf.org/uploads/tx_szleitlinien/032-051OLI_S3_Psychoonkologische_Beratung_Behandlung_2014-01_abgelaufen.pdf). Zugegriffen: 20. Jan. 2022 (AWMF-Registernummer: 032/051OL)

Naegele M, Münster S, Gottlieb T (2019) Woran erkenne ich eine Advanced Practice Nurse. *Onkol Pflege* 9(1):44–46. <https://doi.org/10.4486/j.op.2019.01.06>

Piombo SE, Miller KA, Alderete K, Egan A, Golingay S et al (2020) Evaluation of a nurse-delivered pre-chemotherapy educational intervention to increase knowledge and reduce anxiety among ethnically diverse patients. *J Cancer Educ* 36(4):728–734. <https://doi.org/10.1007/s13187-020-01695-4>

Rebafka A, Hasemann M, Koller A, Leppla L, Möbner U, Naegele M (2018) Karriere machen in der klinischen Pflege. *SchwesterPfleger* 57(10):76

Schmidt S, Meißner T (2008) Organisation und Haftung in der ambulanten Pflege: Praxisbuch, 1. Aufl. Springer, Berlin, Heidelberg

Schalhorn B, Hellberg-Naegele M (2017) Summenscore für Gebrechlichkeit bei älteren Tumorpatienten. *Focus Onkol* 20(3):39–40. <https://doi.org/10.1007/s15015-017-3182-5>

Stefan H, Eberl J, Schalek K, Streif H, Pointner H (Hrsg) (2006) Praxishandbuch Pflegeprozess. Springer, Wien, New York

Wedding U (2019) Geriatrische Onkologie. *Z Gerontol Geriat* 52(1):75–86. <https://doi.org/10.1007/s00391-018-01499-8>

Zentrum für Krebsregisterdaten im Robert Koch-Institut (2021) Datenbankabfrage mit Schätzung der Inzidenz, Prävalenz und des Überlebens von Krebs in Deutschland auf Basis der epidemiologischen Landeskrebsregisterdaten. [www.krebsdaten.de/abfrage](http://www.krebsdaten.de/abfrage). Zugegriffen: 13. Jan. 2022 (Mortalitätsdaten bereitgestellt vom Statistischen Bundesamt)
